# Supplementary material for: School Food Environment in Urban Zambia: A Qualitative Analysis of Drivers of Adolescent Food Choices and Their Policy Implications
Source: MDPI journal article supplement (doi:10.3390/ijerph19127460), 2022-06-17
Supplement: s1 [file s1]

Supplementary Table S1: Student FGD guide

| Food dimensions              | environment | Question                                                                                                              | Probes                                                                                                                                                                                                                                                                                                 |
|------------------------------|-------------|-----------------------------------------------------------------------------------------------------------------------|--------------------------------------------------------------------------------------------------------------------------------------------------------------------------------------------------------------------------------------------------------------------------------------------------------|
| Introduction                 |             | Which foods are mostly consumed by people your age? Why?                                                              | <ul style="list-style-type: none"> <li>- What kind of food do young people your age consider to be healthy? Why?</li> <li>- What kind of food do young people your age consider to be unhealthy? why?</li> </ul>                                                                                       |
| Availability                 |             | Which types of foods and food sources are available in and around your school? Why?                                   | <ul style="list-style-type: none"> <li>- Which types of foods and food sources would young people want to be available in and around your school and community? Why?</li> <li>- How has the availability of foods been affected during the Covid-19 crisis changed?</li> </ul>                         |
| Prices                       |             | How is the price of different food types that are mainly consumed by young people like you?                           | <ul style="list-style-type: none"> <li>- How has the pricing of different food affected during the Covid-19 crisis?</li> </ul>                                                                                                                                                                         |
| Vendors and product property |             | What do young people like you consider when deciding on a place to source food from? Why are these factors important? | <ul style="list-style-type: none"> <li>- What do young people like you consider when deciding what kind of food to buy? Why are these factors important?</li> <li>- How was your decision on what to consider when deciding on a place to source food from impacted by the Covid-19 crisis?</li> </ul> |
| Marketing regulation         | and         | What kind of food marketing strategies have you been exposed to?<br>Accessibility                                     | <ul style="list-style-type: none"> <li>- What are the challenges that you experience in buying healthy food?</li> <li>- How were these challenges impacted during the Covid-19 crisis?</li> </ul>                                                                                                      |
| Affordability                |             | Which food types are you unable to purchase in your current status?                                                   | <ul style="list-style-type: none"> <li>- How do young people like you feel about their ability to buy foods that is healthy?</li> <li>- How was your ability to buy food that is healthy impacted during the Covid-19 crisis?</li> </ul>                                                               |
| Convenience                  |             | What makes it easy or difficult to eat healthy food?                                                                  | <ul style="list-style-type: none"> <li>- What do you feel are some of the challenges people have in preparing or eating healthy foods?</li> </ul>                                                                                                                                                      |

|              |                                                                                |                                                                                                                                                                                                                                 |
|--------------|--------------------------------------------------------------------------------|---------------------------------------------------------------------------------------------------------------------------------------------------------------------------------------------------------------------------------|
|              |                                                                                | - How was your ability to prepare health foods impacted during the Covid-19 crisis?                                                                                                                                             |
| Desirability | Which types of food are young people like you likely to prepare/ consume? Why? | <ul style="list-style-type: none"> <li>- What are the factors that influence choice of foods young people like you eat?</li> <li>- 23. What would make young people like you to buy or eat healthy foods more often?</li> </ul> |

Supplementary Table S2: Food environment check list

| Vendor type          | Present at school (yes/no) | Food types<br>(Mark with an X if food type is sold by vendor) |                     |        |                                  |                                         |               |       |  |
|----------------------|----------------------------|---------------------------------------------------------------|---------------------|--------|----------------------------------|-----------------------------------------|---------------|-------|--|
|                      |                            | Fast foods <sup>1</sup>                                       | Snacks <sup>2</sup> | Nshima | Fruit, fruit juice, fresh salads | Carbonated or sugar sweetened beverages | Milk, yoghurt | Other |  |
| Tuck shop            |                            |                                                               |                     |        |                                  |                                         |               |       |  |
| Katamba              |                            |                                                               |                     |        |                                  |                                         |               |       |  |
| Grocery              |                            |                                                               |                     |        |                                  |                                         |               |       |  |
| Supermarket          |                            |                                                               |                     |        |                                  |                                         |               |       |  |
| Fast food restaurant |                            |                                                               |                     |        |                                  |                                         |               |       |  |
| Street vendor        |                            |                                                               |                     |        |                                  |                                         |               |       |  |
| Other                |                            |                                                               |                     |        |                                  |                                         |               |       |  |

<sup>1</sup>Fast foods included fried chicken and chips, sausage and chips, pizza, *sharwama*

<sup>2</sup>Snack included crisps, *jiggies*, cake, scones, biscuits, doughnuts and sweets
